# Supplementary material for: Dual-stabilizer-capped CdSe quantum dots for “Off–On” electrochemiluminescence biosensing of thrombin by target-triggered multiple amplification
Source: Royal Society of Chemistry journal article supplement (doi:10.1039/c5ra24811f), 2015-12-18
Supplement: c5ra24811f1.pdf [file c5ra24811f1.pdf]

## Supporting Information

### **A Dual-Stabilizers-Capped CdSe Quantum Dot for “Off–On” Electrochemiluminescence Biosensing of Thrombin by Target-Triggered Multiple Amplification**

**Guifen Jie\*, Kai Chen, Xiao chun Wang, Zhengkun Lu**

Key Laboratory of Sensor Analysis of Tumor Marker, Ministry of Education, Qingdao University  
of Science and Technology, 266042, P. R. China

#### **Table of Contents**

|                        |          |
|------------------------|----------|
| <b>Figure S1</b> ..... | <b>2</b> |
| <b>Figure S2</b> ..... | <b>2</b> |
| <b>Figure S3</b> ..... | <b>3</b> |

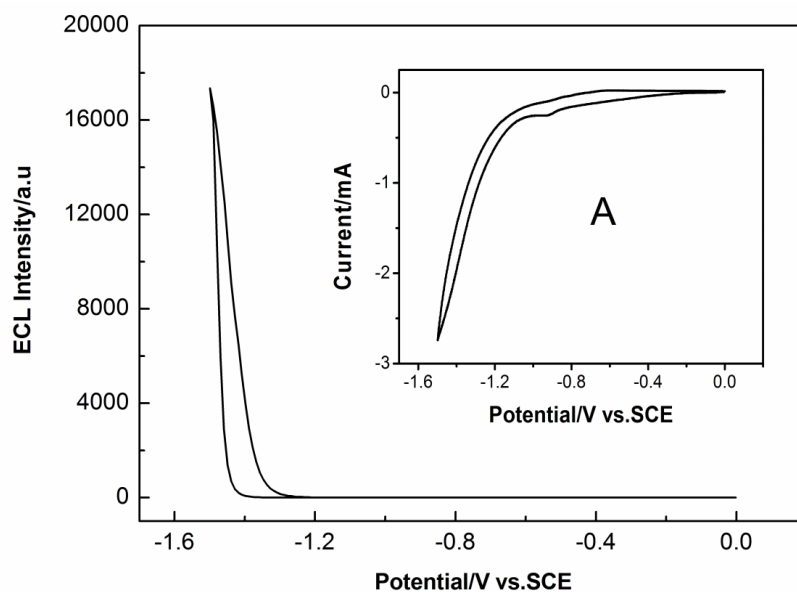

**Figure S1.** ECL-potential curve and cyclic voltammogram (inset) of the dual-stabilizers-capped CdSe QDs.

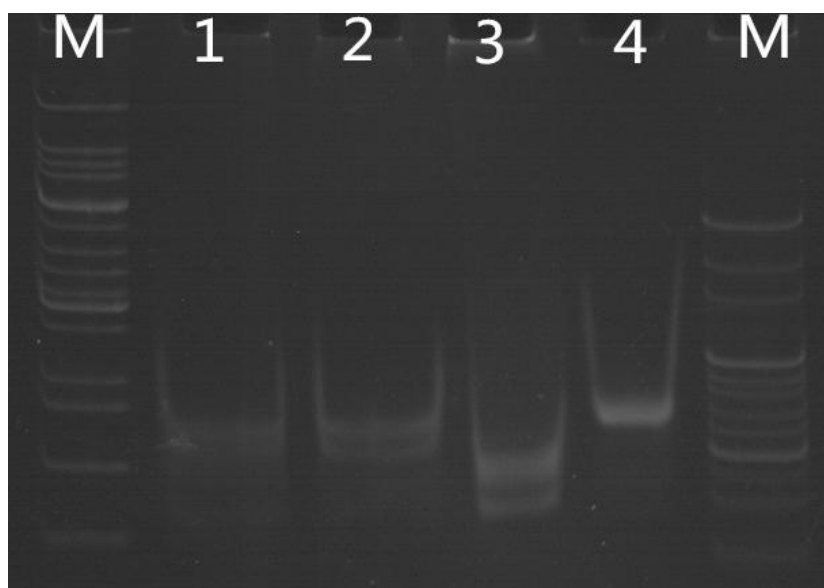

**Figure S2.** Nondenaturing PAGE analysis of reaction products by enzyme-aided multiple DNA cycle amplification. Lane M: the DNA ladder marker; Lanes 1: Hairpin DNA+Primer DNA; Lanes 2: Hairpin DNA+ Primer DNA+Bst DNA polymerase+dNTPs; Lanes 3: Hairpin DNA+ Primer DNA+ Bst DNA polymerase + target thrombin+dNTPs, Lanes 4: Hairpin DNA+ Primer DNA+ Bst DNA polymerase+ target thrombin +dNTPs+lambda exonuclease.

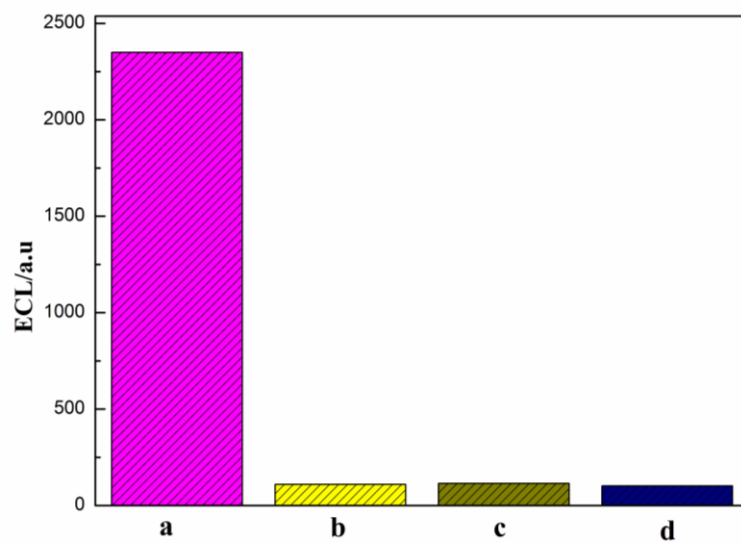

**Figure S3.** Selective detection of thrombin in the presence of interfering proteins. The concentration of interfering proteins was 0.1 nM, and thrombin concentration was 0.01 nM. (a) thrombin, (b) blank, (c) BSA, (d) lysozyme.
